# Supplementary material for: Species-Specificity in Thermopreference and CO2-Gated Heat-Seeking in Culex Mosquitoes
Source: MDPI journal article supplement (doi:10.3390/insects13010092), 2022-01-14
Supplement: s1 [file s1]

**Supplementary Table S1: Analysis of deviance table for the Generalized Linear Mixed Model analyzing the proportion of mosquito landings on Peltier<sub>warm</sub> in the heat seeking assay (data in Table 1)**

|                                                                  | Chisq | Df | <i>P</i> (>Chisq) |
|------------------------------------------------------------------|-------|----|-------------------|
| Species                                                          | 3.61  | 1  | 0.057             |
| CO <sub>2</sub> conc.                                            | 74.41 | 1  | < 0.001           |
| Temp(Peltier <sub>warm</sub> )                                   | 43.51 | 5  | < 0.001           |
| Species : CO <sub>2</sub> conc.                                  | 12.97 | 1  | < 0.001           |
| Species : Temp(Peltier <sub>warm</sub> )                         | 0.95  | 5  | 0.967             |
| CO <sub>2</sub> conc. : Temp(Peltier <sub>warm</sub> )           | 12.96 | 5  | < 0.05            |
| Species : CO <sub>2</sub> conc. : Temp(Peltier <sub>warm</sub> ) | 15.22 | 5  | < 0.01            |

**Supplementary Table S2: Pairwise contrasts for the proportion of mosquito landings on Peltier<sub>warm</sub> in the heat seeking assay (data in Table 1)**

| Contrast                                          | Temperature of Peltier <sub>warm</sub> | CO <sub>2</sub> conc. (ppm) | Odds ratio | Lower CI | Upper CI | <i>P</i> |
|---------------------------------------------------|----------------------------------------|-----------------------------|------------|----------|----------|----------|
| <i>Cx. tarsalis</i> - <i>Cx. quinquefasciatus</i> | 30                                     | 2100                        | 0.876      | 0.623    | 1.231    | 0.4452   |
|                                                   |                                        | 30000                       | 1.322      | 1.03     | 1.698    | 0.0285   |
|                                                   | 35                                     | 2100                        | 0.731      | 0.519    | 1.028    | 0.0719   |
|                                                   |                                        | 30000                       | 1.501      | 1.19     | 1.894    | 0.0006   |
|                                                   | 40                                     | 2100                        | 0.727      | 0.519    | 1.018    | 0.0631   |

|  |    |       |       |       |       |        |
|--|----|-------|-------|-------|-------|--------|
|  | 45 | 30000 | 1.479 | 1.173 | 1.866 | 0.0009 |
|  |    | 2100  | 0.66  | 0.468 | 0.931 | 0.0178 |
|  | 50 | 30000 | 1.466 | 1.162 | 1.85  | 0.0012 |
|  |    | 2100  | 0.664 | 0.47  | 0.939 | 0.0206 |
|  |    | 30000 | 1.501 | 1.185 | 1.901 | 0.0008 |

**Supplementary Table S3: Analysis of deviance table for the Generalized Linear Mixed Model analyzing the proportion of mosquito landings on Peltier<sub>warm</sub> as a function of the duration of exposure to the thermal stimuli in the heat seeking assay (data in Table 2).**

|                                                        | <b>Chisq</b> | <b>Df</b> | <b><i>P</i> (&gt;Chisq)</b> |
|--------------------------------------------------------|--------------|-----------|-----------------------------|
| Species                                                | 214.87       | 10        | < 0.001                     |
| CO <sub>2</sub> conc.                                  | 1759.33      | 10        | < 0.001                     |
| Temp(Peltier <sub>warm</sub> )                         | 406.00       | 23        | < 0.001                     |
| Stim. duration                                         | 259.73       | 19        | < 0.001                     |
| Species : CO <sub>2</sub> conc.                        | 231.82       | 5         | < 0.001                     |
| Species : Temp(Peltier <sub>warm</sub> )               | 31.23        | 13        | < 0.01                      |
| CO <sub>2</sub> conc. : Temp(Peltier <sub>warm</sub> ) | 79.49        | 13        | < 0.001                     |
| Species : Stim. duration                               | 17.82        | 11        | 0.086                       |
| CO <sub>2</sub> conc. : Stim. duration                 | 44.84        | 11        | < 0.001                     |

|                                                                                   |        |    |         |
|-----------------------------------------------------------------------------------|--------|----|---------|
| Temp(Peltier <sub>warm</sub> ) : Stim. duration                                   | 114.37 | 31 | < 0.001 |
| Species : CO <sub>2</sub> conc. : Temp(Peltier <sub>warm</sub> )                  | 39.39  | 8  | < 0.001 |
| Species : CO <sub>2</sub> conc. : Stim. duration                                  | 5.55   | 7  | 0.593   |
| Species : Temp(Peltier <sub>warm</sub> ) : Stim. duration                         | 18.23  | 23 | 0.745   |
| CO <sub>2</sub> conc. : Temp(Peltier <sub>warm</sub> ) : Stim. duration           | 15.77  | 23 | 0.865   |
| Species : CO <sub>2</sub> conc. : Temp(Peltier <sub>warm</sub> ) : Stim. duration | 11.71  | 20 | 0.926   |

**Supplementary Table S4: Pairwise contrasts for the proportion of mosquito landings on Peltier<sub>warm</sub> as a function of the duration of exposure to the thermal stimuli in the heat seeking assay (data in Table 2).**

| Contrast                                          | Duration (min) | CO <sub>2</sub> pulse | CO <sub>2</sub> conc. (ppm) | Odds ratio | Lower CI | Upper CI | <i>P</i> |
|---------------------------------------------------|----------------|-----------------------|-----------------------------|------------|----------|----------|----------|
| <i>Cx. tarsalis</i> - <i>Cx. quinquefasciatus</i> | 0 - 2          | Yes                   | 2100                        | 0.0146     | 0        | –        | 0.9993   |
|                                                   |                |                       | 30000                       | 1.6385     | 1.313    | 2        | <.0001   |
|                                                   | 2 - 4          | No                    | 2100                        | 0.5685     | 0.402    | 1        | 0.0014   |
|                                                   |                |                       | 30000                       | 1.8445     | 1.58     | 2        | <.0001   |
|                                                   | 4 - 6          | No                    | 2100                        | 0.4937     | 0.321    | 1        | 0.0013   |
|                                                   |                |                       | 30000                       | 1.663      | 1.379    | 2        | <.0001   |
|                                                   | 6 - 8          | No                    | 2100                        | 0.6273     | 0.427    | 1        | 0.0176   |
|                                                   |                |                       | 30000                       | 1.5446     | 1.226    | 2        | 0.0002   |

|  |        |    |       |        |       |   |        |
|--|--------|----|-------|--------|-------|---|--------|
|  | 8 - 10 | No | 2100  | 0.5594 | 0.377 | 1 | 0.004  |
|  |        |    | 30000 | 1.3156 | 0.986 | 2 | 0.0627 |

**Supplementary Table S5: Analysis of deviance table for the Generalized Linear Mixed Model analyzing the proportion of mosquito landings on Peltier<sub>warm</sub> at 23°C before every thermal stimulus in the heat seeking assay (data in Table 3).**

|                                               | Chisq  | Df | <i>P</i> (>Chisq) |
|-----------------------------------------------|--------|----|-------------------|
| Species                                       | 107.25 | 9  | < 0.001           |
| CO <sub>2</sub> conc.                         | 447.46 | 9  | < 0.001           |
| Before.temp                                   | 643.44 | 15 | < 0.001           |
| Species : CO <sub>2</sub> conc.               | 85.72  | 4  | < 0.001           |
| Species : Before.temp                         | 33.65  | 7  | < 0.001           |
| CO <sub>2</sub> conc. : Before.temp           | 97.41  | 7  | < 0.001           |
| Species : CO <sub>2</sub> conc. : Before.temp | 17.98  | 4  | < 0.01            |

**Supplementary Table S6: Pairwise contrasts for the proportion of mosquito landings on Peltier<sub>warm</sub> at 23°C before every thermal stimulus in the heat seeking assay (data in Table 3).**

| Contrast                                          | Peltier <sub>warm</sub><br>at 23°C | CO <sub>2</sub><br>pulse | CO <sub>2</sub><br>conc.<br>(ppm) | Odds<br>ratio | Lower<br>CI | Upper<br>CI | <i>P</i> |
|---------------------------------------------------|------------------------------------|--------------------------|-----------------------------------|---------------|-------------|-------------|----------|
| <i>Cx. tarsalis</i> - <i>Cx. quinquefasciatus</i> | before 30°C                        | Yes                      | 2100                              | 0.908         | 0.501       | 2           | 0.7511   |
|                                                   |                                    |                          | 30000                             | 0             | 0           | -           | 0.9996   |

|  |             |    |       |       |       |   |        |
|--|-------------|----|-------|-------|-------|---|--------|
|  | before 35°C | No | 2100  | 1.405 | 0.8   | 2 | 0.2371 |
|  |             |    | 30000 | 0.598 | 0.296 | 1 | 0.1509 |
|  | before 40°C | No | 2100  | 0.361 | 0.235 | 1 | <.0001 |
|  |             |    | 30000 | 0.874 | 0.682 | 1 | 0.2896 |
|  | before 45°C | No | 2100  | 0.33  | 0.227 | 0 | <.0001 |
|  |             |    | 30000 | 0.976 | 0.822 | 1 | 0.7834 |
|  | before 50°C | No | 2100  | 0.355 | 0.261 | 0 | <.0001 |
|  |             |    | 30000 | 1.189 | 0.985 | 1 | 0.0711 |
